# Supplementary material for: Unraveling the potential of bacteria isolated from the equatorial region of Indian Ocean in mercury detoxification
Source: Frontiers journal article supplement (doi:10.3389/fmars.2022.986493), 2022-10-26
Supplement: Data_Sheet_1.docx [file Data_Sheet_1.docx]

**Supplementary Information**

**Unraveling the potential of bacteria isolated from the equatorial region of Indian Ocean in mercury detoxification**

Gajendra Joshia,*, Pankaj Vermab, Balakrishnan Meenaa,Prasun Goswamia†, D Magesh Peterb,

Dilip Kumar Jhab, Nambali Valsalan Vinithkumara and Gopal Dharanib

aAtal Centre for Ocean Science and Technology for Islands, National Institute of Ocean Technology, Ministry of Earth Sciences, Government of India, Port Blair 744103, Andaman and Nicobar Islands, India

bOcean Science and Technology for Islands, National Institute of Ocean Technology, Ministry of Earth Sciences, Government of India, Chennai 600100, India

†Present address; Indian Institute of Science Education and Research, Kolkata, 741 246, India

* Corresponding author: gajendrajoshi4@gmail.com (G. Joshi)

**Material and Methods**

*Isolation and screening of total culturable bacteria (TCB) and CMRB*

All the glasswares were thoroughly rinsed in 4N HNO3, followed by numerous rinses with distilled water prior to use. The stock solution (1 g/L) of mercuric chloride (HgCl2, Merck) was prepared with ultrapure water (UPW, Elix UV5 and Milli-Q, Millipore, USA). The stability of the Hg stock solution was ensured by reducing the pH level below 2.0 using Suprapur elemental grade nitric acid (Merck, India). The media and Hg supplement were sterilized separately (media - autoclaving at 121 °C for 15 min and Hg solution - filtered through a 0.2 μm pore size syringe filter (Whatman, USA).

To isolate total culturable bacteria (TCB), serial dilution (undiluted, 10-2, 10-4, and 10-6) of seawater samples were taken. The aliquot of 100 µL of samples was spread in triplicates onto nutrient-rich medium, i.e. Zobell Marine Agar medium (ZMA, Himedia, Mumbai) plates and incubated at room temperature (RT) for 5 ̶ 7 days under aerobic conditions; so that TCB could grow easily. To isolate and enumerate culturable mercury-resistant bacteria (CMRB), the ZMA media supplemented with 10 mg/L of Hg as HgCl2 was used as an enriched media. TCB and CMRB were counted using the standard formula (CFU/mL).

Based on the morphological difference, various colonies were picked from Hg supplemented petri plates and further purified by re-streaking on HgCl2 supplemented ZMA medium plates. After purification, the glycerol stocking was done for selected MRB isolates and kept at -80 °C. Selected MRBs were further analyzed for their survival in the higher concentration of Hg and their potential to detoxify the Hg.

*Hg2+ tolerance by bacterial isolates*

In brief, overnight-grown CMRB cultures (1% of bacterial inoculum) were used for bioassay and inoculated into Zobell Marine Broth medium (ZMB, Himedia, Mumbai) supplemented with different Hg concentrations i.e. 25, 50, 75, and 100 mg/L of HgCl2. The glass tubes were incubated at 30 °C and 150 rpm for 48 h. In this assay, the cultures that showed growth equivalent to the positive control (with no significant difference) in the presence of 50 mg/L of Hg were selected for further study. Based on the growth behavior of cultures in the presence of more than 50 mg/L of HgCl2, the selected isolates were classified into two different categories i.e. MRB and moderate MRB (MMRB). The culture showed more than 50% growth to the positive control for each strain in the presence of 100 mg/L were considered as MRB, while cultures that showed growth less than 50% were considered as MMRB.

*Antibiotic susceptibility assessment*

The susceptibility/resistance of the MRB towards fifteen antibiotics viz. amoxyclav (AMC, 30 μg), ampicillin (AMP, 10 μg), azithromycin (AZM, 15 μg), cefotaxime (CTX, 30 μg), chloramphenicol (CP, 30 μg), ciprofloxacin (CFX, 5 μg), erythromycin (EM, 15 μg), gatifloxacin (GFX, 5 μg), gentamicin (GM, 10 μg), kanamycin (KM, 30 μg), methicillin (MC, 5μg ), norfloxacin (NFX, 10 μg), streptomycin (SM, 10 μg), tetracycline (TC, 30 μg), and vancomycin (VM, 30 μg) was determined by the disk diffusion method (CLSI 2013) on Mueller-Hinton Agar medium (MHA, Himedia, Mumbai). The presence of a clear zone around the disc after overnight incubation indicated sensitivity towards particular antibiotics. Subsequently, the diameters of inhibition zones were measured, whereas bacterial growth was observed around the disk in the case of resistance.

*DNA isolation and 16S rDNA based identification*

In brief, the freshly grown bacterial cells in the ZMB medium were used to isolate the genomic DNA using the bacterial genomic DNA extraction kit (Himedia, Mumbai). The polymerase chain reaction (PCR) amplification was executed with the universal 16S rDNA primers of 27F and 1495R. The amplified PCR products were analyzed using an agarose gel electrophoresis unit (1.5%) and examined under a gel documentation system (BioRad). Further, PCR products were purified and quantified by DS-11 Spectrophotometer (DeNovix Inc.) followed by sequencing the 16S rDNA region. Sequence similarity has been analyzed with the existing 16S rDNA sequences by applying the BLASTn at www.ncbi.nlm.nih.gov/nucleotide after obtaining the consensus sequences using BioEdit (7.0.5.3). To perform multiple sequence alignments of sequence, ClustalX (1.83) was used. MEGA X software was used to construct a phylogenetic tree using the neighbor-joining (NJ) DNA distance algorithm (Kumar et al. 2018). Based on 1,000 re-samplings of NJ data sets, the bootstrap analysis was performed to evaluate the resultant tree topologies (Felsenstein 1985).

*Mercury estimation*

The level of mercury in the supernatant was determined using analytical grade reagents and chemicals. All the containers and vessels were cleaned by soaking in 5% HNO3 for 24 h followed by rinsing with UPW and drying. In brief, 5 mL of bacterial supernatant was added to 5 mL of concentrated HNO3 (Suprapur, Merck) before microwave digestion. After digestion, the sample was transferred to centrifuge tubes, and the volume was made up to 50 mL with UPW.

*Molecular docking*

To prepare a macromolecule, the PDB file of targeted protein i.e. GST enzyme (PDB ID-1R5A) was obtained in 3D structure from the Protein Data Bank database (https://www.rcsb.org/structure/1R5A). The BIOVA Discovery Studio Visualizer Tool 21.1.0.0 (https://www.3ds.com) was used to open the targeted protein and normalize the protein by removing the water molecules and non-bounded residues; eliminating the unwanted portion of the protein and small molecules, and normalizing the energy of selected chains. Further, after identifying and defining the binding sites, polar hydrogen was added. Before saving the normalized protein, we ensured that all the binding sites were enclosed by the binding sphere and noted down the XYZ attributes and radius of the binding sphere. Gasteiger charges and Kollman charges were also applied to the normalized GST using AutoDock Vina (ADV) as described by Trott and Olson, 2010. Finally, the 3D structure of normalized GST was saved in PDB format for further docking studies.

For ligand preparation, the SDF file of bioactive compound i.e. Isooctyl thioglycolate (IOTG) was downloaded from PubChem (https://pubchem.ncbi.nlm.nih.gov/compound/Isooctyl-thioglycolate) and, the obtained SDF file was converted into PDB file format using Online SMILES Translator and Structure File Generator tool available at https://cactus.nci.nih.gov/translate. Molecular docking was performed using ADV software and BIOVA Discovery Studio Visualizer Tool 21.1.0.0 was used to perceive the interactions between receptor and ligand.

**Results**

*Physico-chemical parameters of water*

The physico-chemical parameters of the samples collected from two different sites were identical to each other and within acceptable limits. There was no significant variation observed, which is quite natural when the atmospheric profile of the ecosystem is taken into consideration. The surface water salinity of the equatorial region of the Indian Ocean was 34.10 and 35.46 PSU, respectively, at Site 1 and Site 2. A notable change in temperature was observed on a photic layer that varied from 29.41 ºC (Site 1) to 28.45 ºC (Site 2). A similar salinity and temperature profile of the equatorial region of the Indian Ocean was reported in previous studies (Subha Anand S 2014). Hg concentration in all the collected samples was below the detection limit (0.73 µg/L).

**Table S1** Total culturable bacterial and culturable mercury resistant bacteria count from seawater samples collected from the ERIO. Data were represented as the mean ± SD (n=3).

| **Site** | **GPS Location** | **Depth (m)** | **Salinity (PSU)** | **Temperature (°C)** | **TCB Count**  **(x102 CFU / mL) ± SD** | **Total CMRB Count (x102 CFU/mL) ± SD** | **% of CMRB** |
| --- | --- | --- | --- | --- | --- | --- | --- |
| 1 | 00° 00′ 559″ N &  80° 37′ 919″ E | 5 | 34.10 | 29.41 | 176.66 ± 47.71 | 26.66 ± 10.21 | 16.20 |
| 2 | 00° 28′ 649″ N &  87° 50′ 546″ E | 5 | 35.46 | 28.45 | 131 ± 37.04 | 9 ± 4 | 6.84 |

*Effect of Hg2+on isolates*

**Fig. S1.** Growth of four cultures in the presence of various Hg2+ concentrations (a) OD600nm and (b) dry biomass. The test concentrations include 0, 25, 50, 75, and 100 mg/L of Hg as HgCl2. Bars with an asterisk (*) indicate significant differences in the level of p < 0.05. Results represented as mean ± SD (n=3).


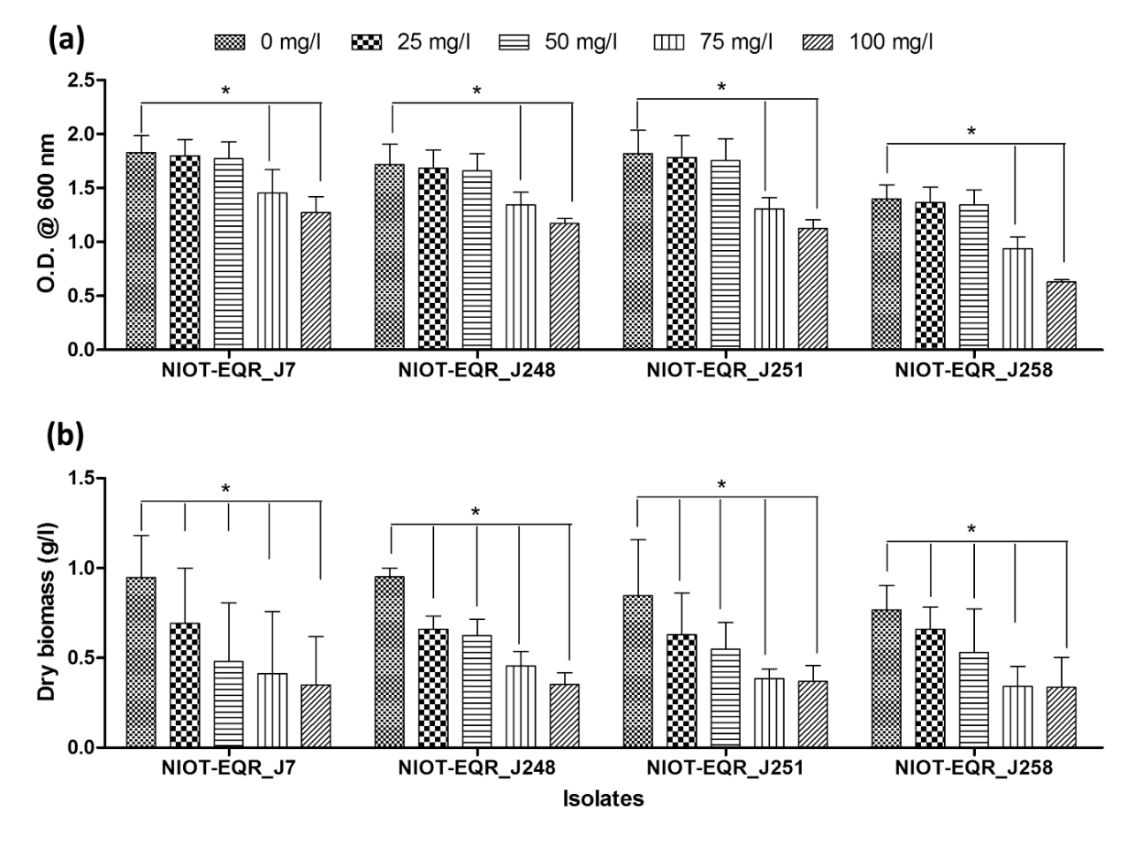


**Table S2** The method recovery percentage of mercury by ICP-MS during the experiment (Detection limit - 0.73 µg/L).

| **Nominal concentration (mg/L)** | **Measured concentration (mg/L)** | **Recovery (%)** | **Average recovery (%)** |
| --- | --- | --- | --- |
| 0 | < DL | NC | NC |
| 0 | < DL | NC |
| 0 | < DL | NC |
| 50 | 44.08 | 88.16 | 92.81 ± 3.27 |
| 50 | 45.41 | 90.82 |
| 50 | 46.07 | 92.14 |
| 100 | 93.85 | 93.85 |
| 100 | 97.77 | 97.77 |
| 100 | 94.15 | 94.15 |

< DL: Below detection limit, NC: Not calculated

*Antibiotic tolerance of isolates*

The strains were found to resist different antibiotics. The isolate NIOT-EQR_J7 showed resistance against 11 antibiotics, whereas isolate NIOT-EQR_J248, isolate NIOT-EQR_J251 and isolate NIOT-EQR_J258 were resistant against 3, 2, and 4 antibiotics, respectively. In this study, the maximum zone of inhibition of 35 mm was shown by NIOT-EQR_J251 against CTX 30 μg. However, the minimum zone of inhibition of 12 mm showed by NIOT-EQR_J7 and NIOT-EQR_J251 against GM 10 μg and AMC 30 μg, respectively. The detailed results of tolerance of isolates against various antibiotics are shown in Table S3. Environmental bacteria codified the same genetic element such as plasmids and transposons for toxic metal resistance genes and antimicrobial drugs (Wang et al. 2006; Hassen et al. 1998). Consequently, metal and antibiotic resistance have been found and characterized in several bacterial systems at the molecular level (Lee et al. 2001). The antibiotic tolerance of isolates is of interest as they are promising candidates for bioremediation of Hg.

**Table S3** Tolerance of MRB and MMRB isolates against various antibiotics tested in the MHA medium

| **Antibiotics** | **Culture & diameter of inhibition zone (mm)** | | | |
| --- | --- | --- | --- | --- |
| **NIOT-EQR_J7** | **NIOT-EQR_J248** | **NIOT-EQR_J251** | **NIOT-EQR_J258** |
| AMC 30 μg | 0 (R) | 0 (R) | 12 (S) | 0 (R) |
| AMP 10 μg | 0 (R) | 18 (S) | 22 (S) | 29 (S) |
| AZM 15 μg | 0 (R) | 25 (S) | 26 (S) | 0 (R) |
| CTX 30 μg | 31 (S) | 19 (S) | 35 (S) | 22 (S) |
| CP 30 μg | 0 (R) | 32 (S) | 31 (S) | 32 (S) |
| CFX 5 μg | 0 (R) | 28 (S) | 25 (S) | 24 (S) |
| EM 15 μg | 0 (R) | 19 (S) | 22 (S) | 30 (S) |
| GFX 5 μg | 17 (S) | 27 (S) | 27 (S) | 18 (S) |
| GM 10 μg | 12 (S) | 21 (S) | 22 (S) | 18 (S) |
| KM 30 μg | 0 (R) | 14 (S) | 16 (S) | 17 (S) |
| MC 5 μg | 0 (R) | 0 (R) | 0 (R) | 0 (R) |
| NFX 10 μg | 0 (R) | 27 (S) | 22 (S) | 25 (S) |
| SM 10 μg | 0 (R) | 15 (S) | 14 (S) | 18 (S) |
| TC 30 μg | 21 (S) | 20 (S) | 18 (S) | 21 (S) |
| VM 30 μg | 0 (R) | 0 (R) | 0 (R) | 0 (R) |

R-Resistant, S-Susceptible

*Amplification of 16S rDNA*

**Fig. S2.** Gel electrophoresis analysis of 16S rDNA gene amplicons of MRB and MMRB strains. Lane 1: 1 kb DNA Ladder, and Lane 2 to 5: amplified products.


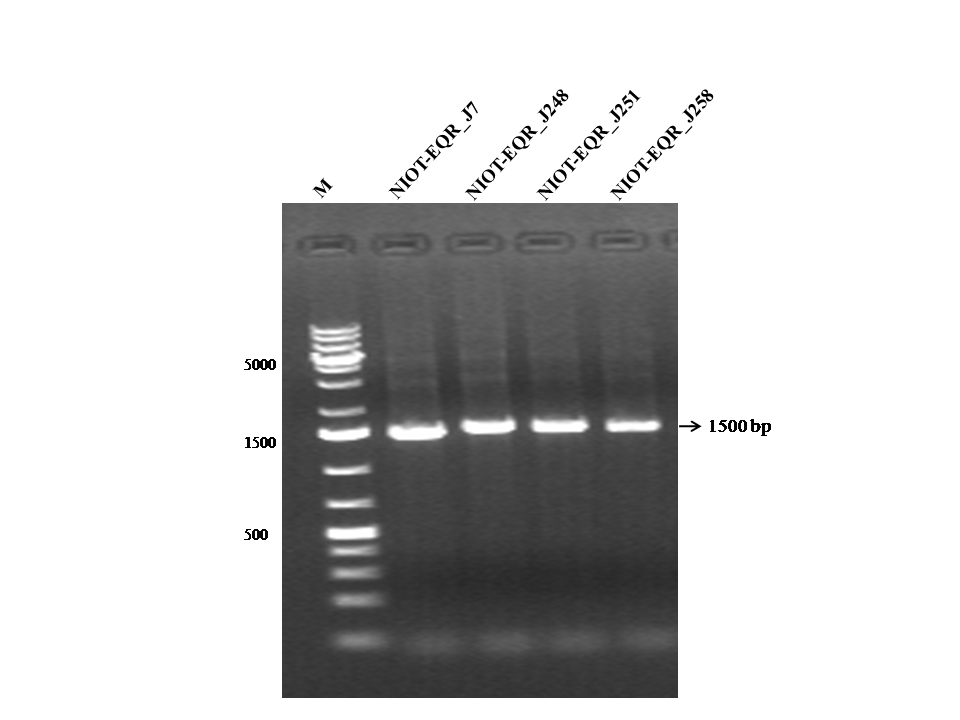


*FT-IR analysis*

A distinct pattern and shift in wavelengths have been observed in the range of 400 ̶ 4000 cm-1 in some functional groups of all the four cultures in the absence and presence of Hg as HgCl2. The major shifts in wavenumbers were attributed to −OH (alcohol), Alkane C-H, OH (Carboxylic acid), Amide (C=O), Nitro (N-O) group, Amine (C–N), phosphate (P=O stretch), and alkyl halide groups, respectively. Fig. 5 a-d displays the FT-IR spectra of 4 MRB with and without Hg2+. The spectrum of NIOT-EQR_J7 (Fig. 5a) showed one sharp peak around 3234.15 cm-1 which was attributed to OH (Alcohol) group, was appeared in the presence of Hg2+, whereas four peaks around 2800.07, 2540.19, 992.06, 922.45 cm-1 which were attributed to Alkane C-H, =OH (Carboxylic acid) and P=O stretch, was disappeared in the presence of Hg2+. The peaks corresponding to Alkane C-H, Amide C = O stretch, N-O asymmetric stretch, Aromatic C=C Stretch, Amine (C-N), P=O stretch were found to be shifted when bacteria were grown in the presence of Hg2+. In the case of NIOT-EQR_J248 with Hg2+, the spectrum (Fig. 5b) designated corresponding stretching vibrations of Alkane C-H (2923.88, 2814.42 cm-1), N-O stretch (1602.80, 1523.59 cm-1), Aromatic C=C Stretch (1439.04 cm-1), P=O stretch (967.06 cm-1), Alkyl halide (748.15 cm-1) were found to be shifted at around 2917.24, 2829.07 cm-1 (Alkane C-H), 1598.59, 1512.17 cm-1 (N-O stretch), 1412.68 cm-1 (Aromatic C=C Stretch), 921.19 cm-1 (P=O stretch), and 721.47 cm-1 (Alkyl halide), respectively without Hg2+ supplementation. Also, a new peak around 1736.53 cm-1 (Amide C = O stretch) was noticed with Hg2+ whereas peaks at 1368.77, 1233.03, 1069.50, 827.61, and 763.70 cm-1 were observed without Hg2+. On the other hand, the spectrum of NIOT-EQR_J251 showed peaks in wavenumbers of 1641.71, 1546.29, 1398.29, 1248.61, 1134.18, 964.26, and 903.97 cm-1 which demonstrated the characteristic vibrations of the Amide C = O stretch, N-O asymmetric stretch, N-O symmetric stretch, C–N stretching, Organic phosphates (P=O) stretching, and Aromatic phosphates (P-O-C stretch), respectively found to be shifted in the absence of Hg2+ (as shown in Fig. 5c). Additionally, one new peak at 2994.94 cm-1 in the presence of Hg2+ and three peaks at 2733.19, 2613.26, 751.51 cm-1 in the absence of Hg2+ appeared, which are assigned to Alkane C-H, =OH (Carboxylic acid) and Alkyl halide. Apart from this in Fig. 5d, FTIR analysis of NIOT-EQR_J258 revealed the peaks in the absence of Hg2+ at 1718.86, 1594.03, 1358.84, 1206.39, 1053.23 and 864.95 cm-1 indicated stretching vibration of Amide C = O stretch, Nitro (N-O), Amine (C-N), P=O and Alkyl halide functional groups found to be shifted at 1692.13, 1597.90, 1366.57, 1273.25, 1087.95 and 827.96 cm-1 when grown in the presence of Hg2+. Also, a new peak at 3017.95 cm-1 was noticed in the absence of Hg2+, attributed to Alkane C-H.

**Table S4** The shift of major wavelengths (cm-1) of the functional groups in IR spectra of four strains grown with (50 mg/L Hg as HgCl2) and without Hg2+ supplementation.

| **Culture ID** | **Functional Groups** | **With Hg2+** | **Without Hg2+** | **Remark** |
| --- | --- | --- | --- | --- |
| NIOT-EQR_J7 | OH (Alcohol) | 3234.15 | absent | P-1, New Peak with Hg2+ |
| Alkane C-H | 2957.58 | 2991.63 | P-2, wavelength shift |
| Alkane C-H | absent | 2800.07 | P-3, New Peak without Hg2+ |
| =OH (Carboxylic acid) | absent | 2540.19 | P-4, New Peak without Hg2+ |
| S-H Stretch | 2383.09 | 2442.42 | P-5, wavelength shift and Peak decreased with Hg2+ |
| Amide C = O stretch | 1626.87 | 1618.15 | P-6, wavelength shift and Peak negligible with Hg2+ |
| N-O asymmetric stretch | 1554.98 | 1508.70 | P-7, New Peak without Hg2+ |
| Aromatic C=C Stretch | 1447.71 | 1459.56 | P-8, wavelength shift and Peak height and area increased with Hg2+ |
| Amine (C-N) | 1251.22 | 1248.82 | P-9, wavelength shift and Peak negligible with Hg2+ |
| Aromatic phosphates (P-O-C stretch) | 1201. 08 | 1209.93 | P-10, wavelength shift and Peak negligible with Hg2+ |
| P=O stretch | 1111.48 | 1129.19 | P-11, wavelength shift and Peak negligible with Hg2+ |
| C-O Stretch | 1043.82 | 1064.44 | P-12, wavelength shift and Peak negligible with Hg2+ |
| Aromatic phosphates (P-O-C stretch) | absent | 992.06 | P-13, New Peak without Hg2+ |
| Aliphatic phosphates (P-O-C stretch) | absent | 922.45 | P-14, New Peak without Hg2+ |
| Alkyl halide | 846.29 | 852.07 | P-15, wavelength shift and Peak negligible with Hg2+ |
| NIOT-EQR_J248 | Alkane C-H | 2923.88 | 2917.24 | P-1, Peak increased with Hg2+ |
| Alkane C-H | 2814.42 | 2829.07 | P-2, |
| S-H Stretch | 2304.55 | 2246.72 | P-3, Peak increased with Hg2+ |
| Amide C = O stretch | 1736.53 | absent | P-4, New Peak with Hg2+ |
| N-O asymmetric stretch | 1602.80 | 1598.59 | P-5, Peak decreased with Hg2+ |
| N-O asymmetric stretch | 1523.59 | 1512.17 | P-6, Peak decreased with Hg2+ |
| Aromatic C=C Stretch | 1439.04 | 1412.68 | P-7, Peak decreased with Hg2+ |
| N–O symmetric stretch | absent | 1368.77 | P-8, New Peak without Hg2+ |
| Amine (C-N) | absent | 1233.03 | P-9, New Peak without Hg2+ |
| C-O Stretch | absent | 1069.50 | P-10, New Peak without Hg2+ |
| Aromatic phosphates (P-O-C stretch) | 967.0629 | 921.19 | P-11, Peak increased with Hg2+ |
| Alkyl halide (C-Cl) | absent | 827.61 | P-12, New Peak without Hg2+ |
| Alkyl halide (C-Cl) | absent | 763.70 | P-13, New Peak without Hg2+ |
| Alkyl halide (C-Cl) | 748.1596 | 721.47 | P-14, Peak increased without Hg2+ |
| NIOT-EQR_J251 | Alkane C-H | 2994.94 | absent | P-1, New Peak with Hg2+ |
| =OH (Carboxylic acid) | absent | 2733.19 | P-2, New Peak without Hg2+ |
| =OH (Carboxylic acid) | absent | 2613.26 | P-3, New Peak without Hg2+ |
| S-H Stretch | 2341.34 | absent | P-4, New Peak with Hg2+ |
| Amide C = O stretch | 1641.71 | 1653.01 | P-5, Wavelength shift |
| N-O asymmetric stretch | 1546.29 | 1563.58 | P-6, Peak area increased with Hg2+ |
| N–O symmetric stretch | 1398.29 | 1456.58 | P-7, Wavelength shift |
| Amine (C-N) | 1248.61 | 1222.61 | P-8, Peak height increased without Hg2+ |
| P=O | 1134.18 | 1105.97 | P-9, Peak height increased without Hg2+ |
| Aromatic phosphates (P-O-C stretch) | 964.26 | 961.03 | P-10, Peak height increased without Hg2+ |
| Aromatic phosphates (P-O-C stretch) | 903.97 | 918.48 | P-11 Peak height increased without Hg2+ |
| Alkyl halide | absent | 751.51 | P-12, New Peak without Hg2+ |
| NIOT-EQR_J258 | Alkane C-H | absent | 3017.95 | P-1, New Peak without Hg2+ |
| Amide C = O stretch | 1692.13 | 1718.86 | P-2, Peak height, and peak area increased with Hg2+ |
| N-O asymmetric stretch | 1597.90 | 1594.03 | P-3, Peak height increased with Hg2+ |
| N–O symmetric stretch | 1366.57 | 1358.84 | P-4, Wavelength shift |
| Amine (C-N) | 1273.25 | 1206.39 | P-5, Wavelength shift |
| P=O | 1087.95 | 1053.23 | P-6, Wavelength shift |
| Alkyl halide | 827.96 | 864.95 | P-7, Wavelength shift |

*GC-MS analysis*

As per our knowledge, this is the first GC-MS based study for the identification of metabolites leading to Hg resistance and/or detoxification in bacterial strains isolated from the ERIO, which might play an important role to understand how metabolic changes take place within the bacterial cells and their role in Hg bioremediation.

In the control sample, two compounds viz. Tetracontane, 3,5,24-trimethyl-; and 2-Octadecyl-propane-1,3-diol were present which have been disappeared in Hg treated samples while in the presence of Hg three new compounds were noticed i.e. Oxalic acid, cyclobutyl pentadecyl ester; 1,3-Dioxolane, 4-ethyl-5-octyl-2,2-bis(trifluoromethyl)-, trans-; and Hexadecane, 1-(ethenyloxy)-. In the case of NIOT-EQR_J248, 10 compounds were identified in the control sample whereas 16 metabolites were present with Hg. Total six metabolites namely, 1,2-Benzenedicarboxylic acid, butyl octyl ester; 1,2-Benzenedicarboxylic acid, butyl cyclohexyl ester; cis-13-Octadecenoic acid; 1-Heptacosanol; Valine, N-methyl-N-allyloxycarbonyl-, heptadecyl ester; 1-(Hexahydropyrrolizin-3-ylidene)-3,3-dimethyl-butan-2-one were present in control samples while in presence of Hg, these compounds were not detected. However, eight new compounds IOTG; 17-Pentatriacontene; Cyclooctasiloxane, hexadecamethyl-; Tritetracontane; Phthalic acid, hexyl tridec-2-yn-1-yl ester; Octatriacontyl pentafluoropropionate; trans-13-Octadecenoic acid; and Hexadecane, 1-(ethenyloxy)- were observed in presence of Hg. NIOT-EQR_J251 showed 20 and 22 compounds in the absence and presence of Hg. In absence of Hg, 9 metabolites viz. Benzo[b]dihydropyran, 6-hydroxy-4,4,5,7,8-pentamethyl-; 1-Heptacosanol; Ambucetamide; Oleic acid, eicosyl ester; Docosanoic anhydride; 3-(Pyrrol[1,1,3,3-tetramethyl-3-(undecyloxy)disilo; 1,3-Dioxolane, 4-ethyl-5-octyl-2,2-bis(trifluoromethyl)-, trans-; 9,12,15-Octadecatrienoic acid, 2-phenyl-1,3-dioxan-5-yl ester; and 2-Butenoic acid, 2-methyl-,1,1a,1b,4,4a,5,7a,7b,8 were detected, while in presence of Hg, 13 new compounds IOTG; 7,9-Di-tert-butyl-1-oxaspiro(4,5)deca-6,9-diene-2,8-dione; n-Hexadecanoic acid; L-Proline, N-(2,5-ditrifluoromethylbenzoyl)-, heptadecyl ester; Pentacyclo[19.3.1.1(3,7).1(9, 13).1(15,19)]octacosa; 9-Desoxy-9x-chloroingol 3,7,8,12-tetraacetate; Butyl 9-tetradecenoate; Benzo[1,2-c:4,5-c']dipyrrole-1,3,5,7(2H,6H)-tetrone; Allopregnane-7.alpha.,11.alpha.-diol-3,20-dione; Dipyridamole; Norcodeine di-TMS derivative; 9-Octadecene, 1-[2-(octadecyloxy)ethoxy]; and Octadecanoic acid, 2-(hexadecyloxy)ethyl ester) were observed which were not present in control samples. In both Hg untreated and treated samples, NIOT-EQR_J258 showed 6 and 11 metabolites respectively. Total four metabolites i.e. Phthalic acid, octyl 2-pentyl ester; Hexacosanol, acetate; Prost-13-en-1-oic acid, 9-(methoxyimino); and 9-Hexadecenoic acid, 9-octadecenyl ester were common in both samples. The compounds 2-Butenoic acid, 2-methyl-, 1,1a,1b,4,4a,5,7a,7b,8 and 9-Octadecene, 1-[2-(octadecyloxy)ethoxy], which were present in the untreated samples found to be disappeared in Hg treated sample. However, compounds Isophthalic acid, propyl tridec-2-ynyl ester; Cyclopentane, 1-pentyl-2-propyl-; Oleyl alcohol, trifluoroacetate; 1,3-Dioxolane, 4-ethyl-5-octyl-2,2-bis(trifluoromethyl)-, trans-; 17-Octadecen -1-ol acetate; and Octadecanoic acid, 2-(hexadecyloxy)ethyl ester were detected in Hg treated sample. Further research can be extended to evaluate the importance of *Halomonas* sp. and explore its role in the bioremediation of Hg.

**Fig. S3.** GC-MS chromatogram of MRB and MMRB strains in presence and absence of 50 mg/L of Hg2+ as HgCl2, (a and b) NIOT-EQR_J7, (c and d) NIOT-EQR_J248, (e and f) NIOT-EQR_J251 and (g and h) NIOT-EQR_J258 without and with Hg, respectively.


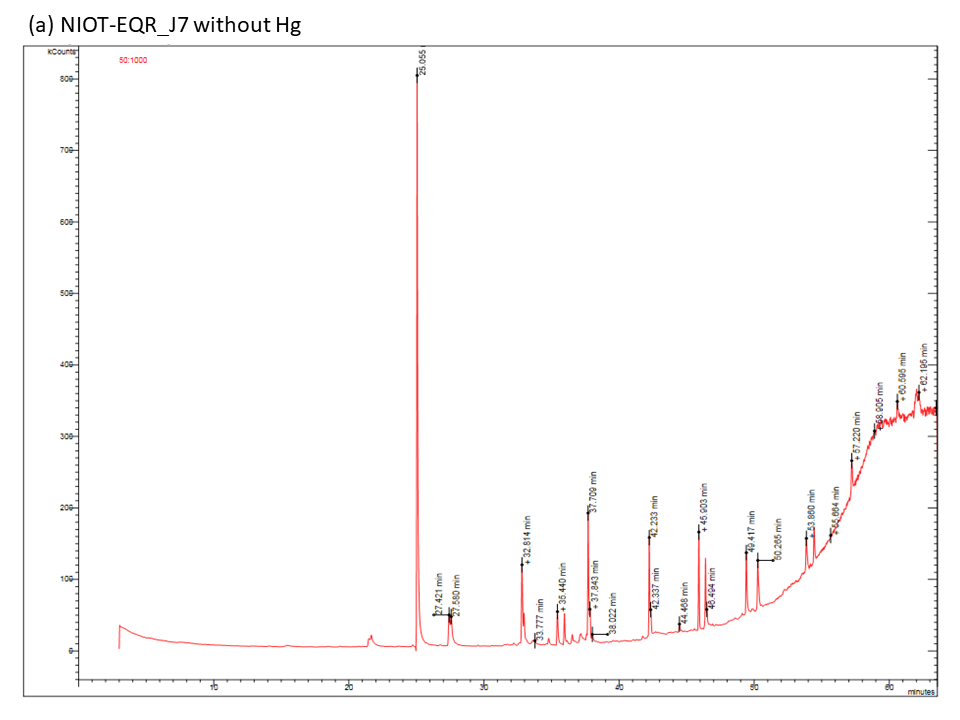


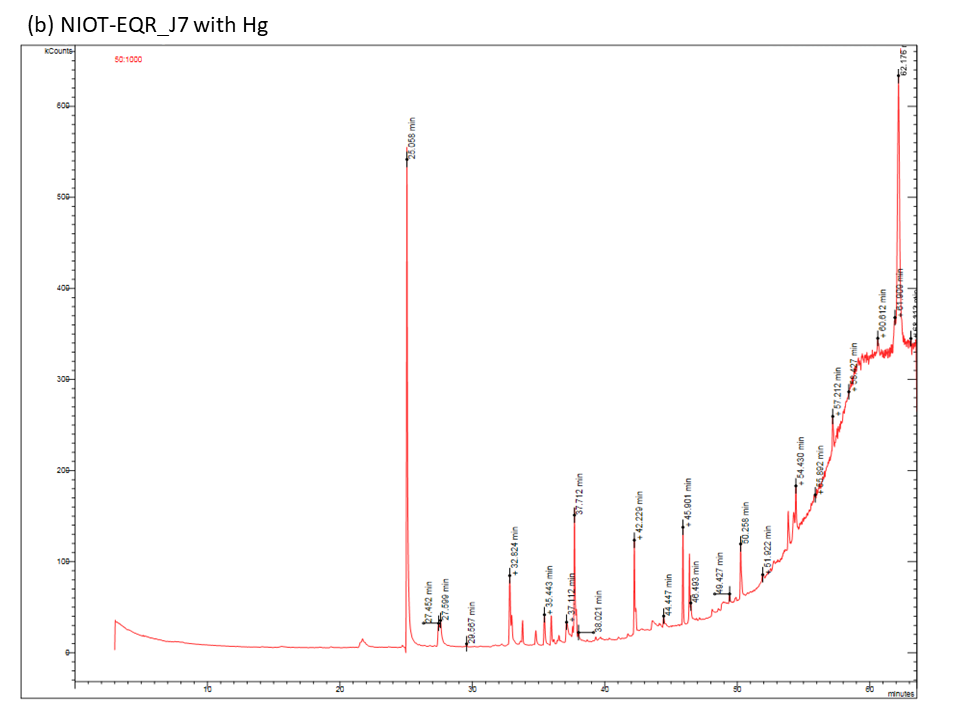


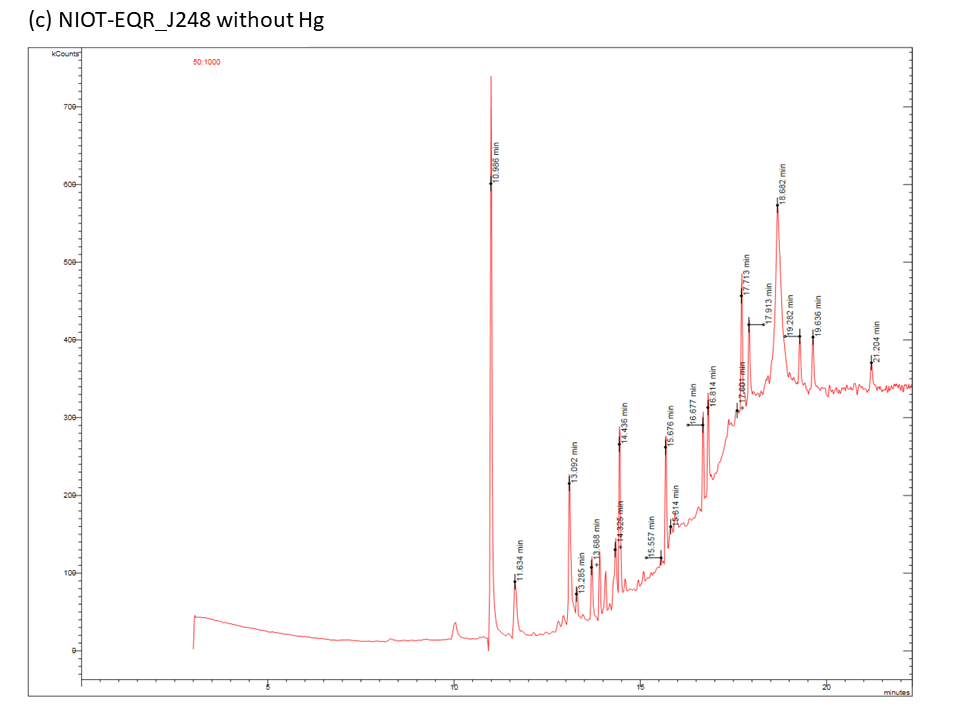

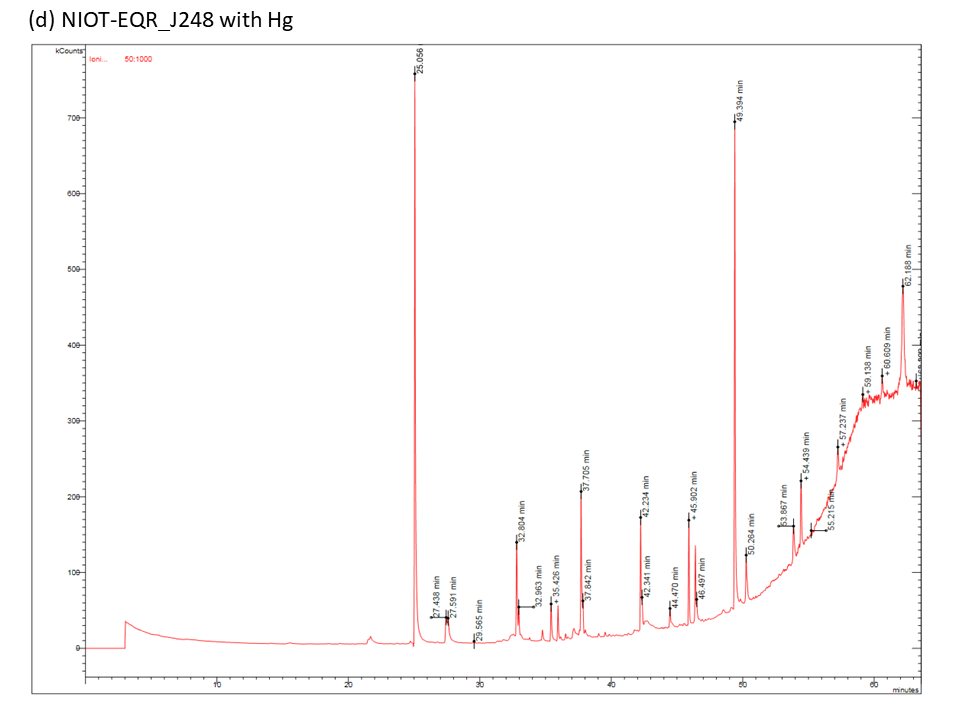

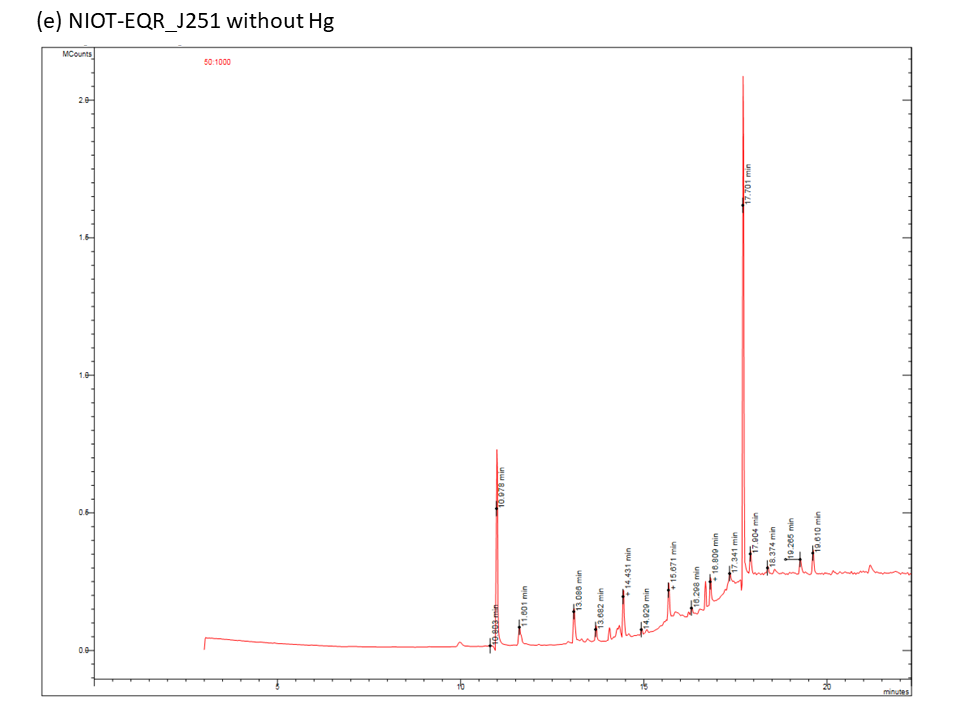

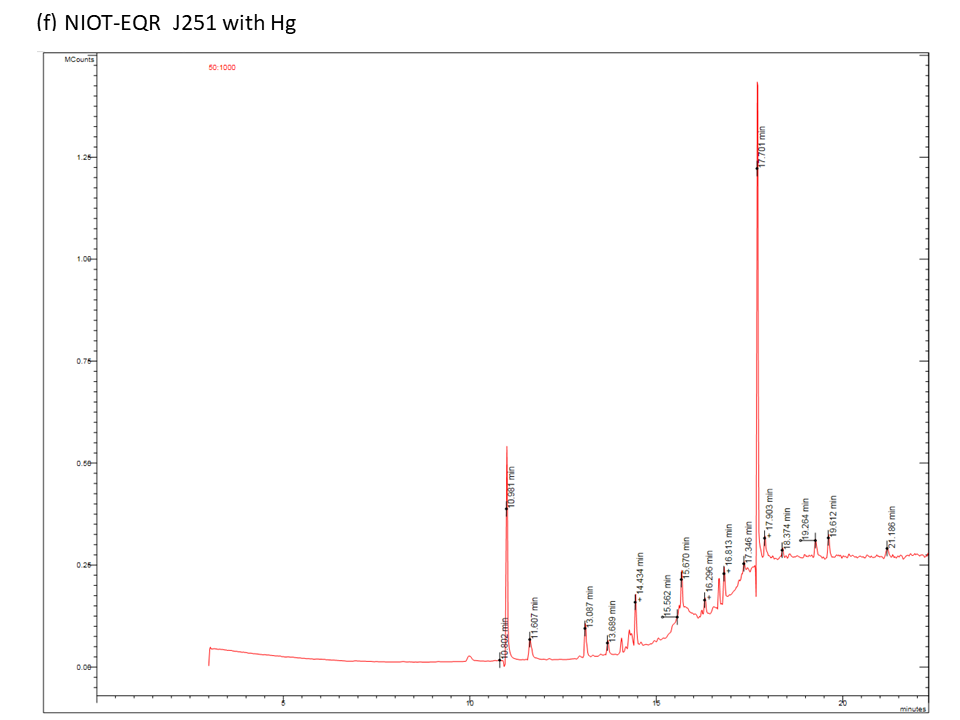

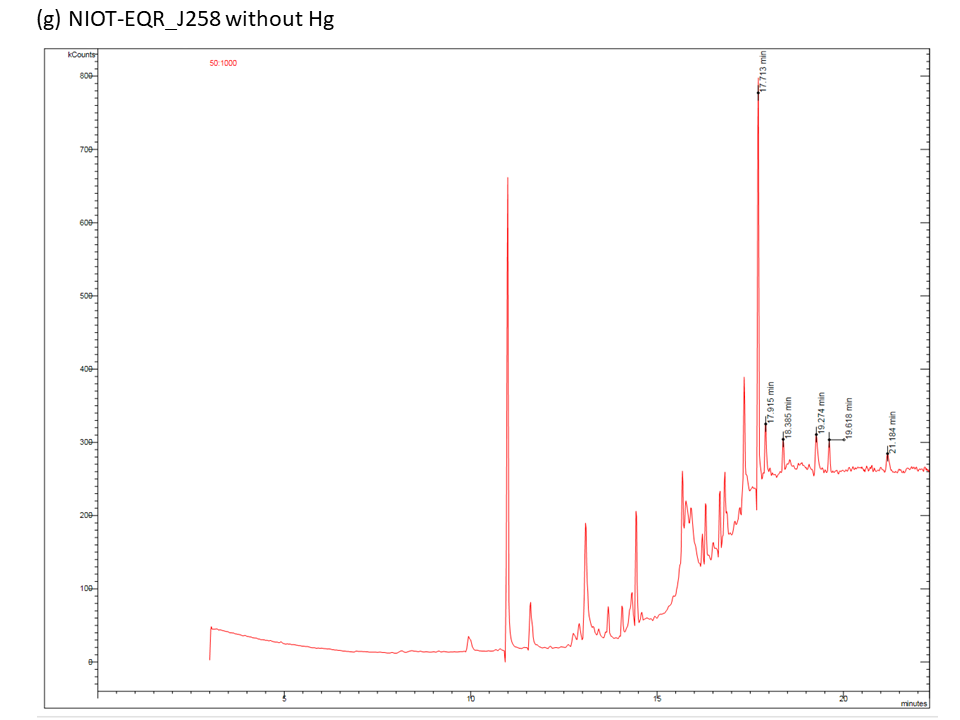

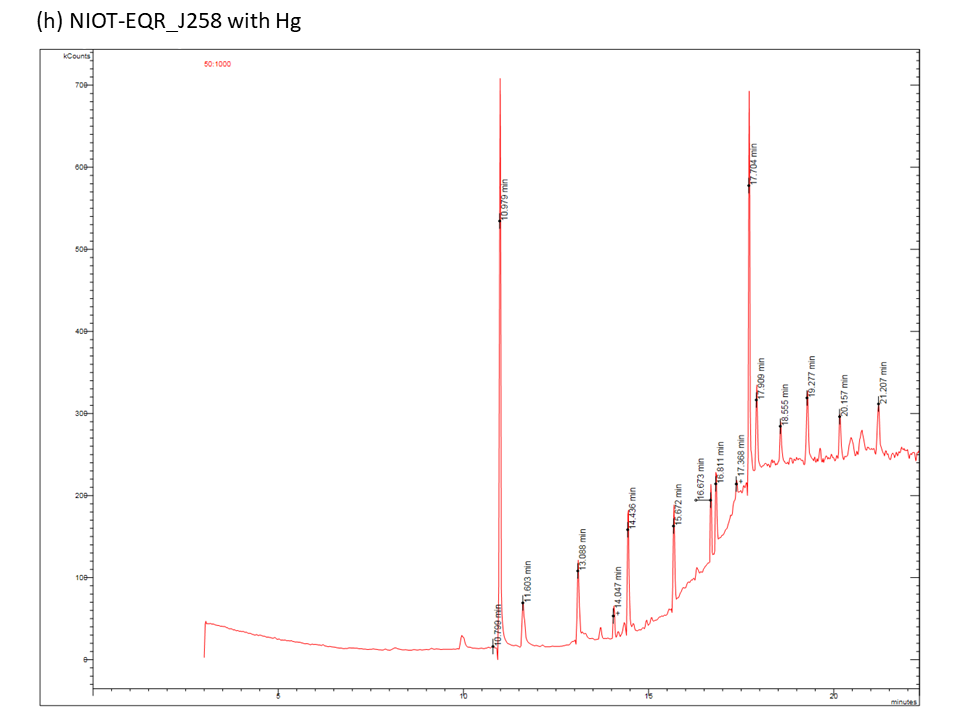


*Molecular Docking*

In presence of Hg2+, a total of 30 new compounds were detected. The Swiss-ADME server predicted that the obtained bioactive compounds may target the number of proteins. The SwissTargetPrediction server revealed that 26.7% of enzymes, 20-20% of Family A G protein-coupled receptor and Lyase, 13.3% of protease, and 6.7% of each Hydrolase, Kinase, cytochrome P450 may be targeted as receptors including the GST enzyme by the compound IOTG (Fig. S4).

The bioactive compounds that passed the initial screening were only selected for docking study. The probable binding site in GST was identified. The GST has only one A chain. A binding sphere was prepared and coordinates X = 115.83, Y= 24.22, and Z = -0.80 were assigned. The ADV software showed 9 rotatable bonds in the compound IOTG and the binding affinity at different positions. Further, BIOVA Discovery Studio Visualizer Tool 21.1.0.0 was used to see the best interaction position between protein and ligand. The best-scored ligand IOTG stabilized with GST was within the binding sphere by forming four hydrogen bonds with Glu66, Ser67 (2 nos.), Arg68; four hydrophobic bonds with Val111, Tyr107 (2 nos.), Phe115 and their bond length were 3.03, 1.98, 2.64, 2.89, 4.29, 5.49, 5.47 and 5.11 A˚, respectively. The ligand also showed five van der Waals interactions with Pro12, Pro13, Ile54, Pro55, Leu103 (Table S5 and Fig S5).

**Table S5** The physicochemical properties of the selected compound as a ligand (IOTG) and its interactions with the receptor (GST)

| **Physicochemical Properties** | | | | | |
| --- | --- | --- | --- | --- | --- |
| Formula | MW (g/mol) | NRB | NHBA | NHBD | LogP |
| C10H20O2S | 204.33 | 8 | 2 | Nil | 2.91 |
| **Binding affinity of ligands with GST and intermolecular interaction** | | | | | |
| BA (Kcal/mol) | Interaction with Amino Acid | | | | |
| Conventional Hydrogen Bond | Van der waals | Alkyl | Unfavourable donar-donar | Binding Site |
| - 3.8 | Four Nos. | Five Nos. | Four Nos. | One No. | D2 nominal site and M1 (G-site) |

MW - Molecular weight; NRB - Num. rotatable bonds; NHBA - Num. H-bond acceptors; NHBD - Num. H-bond donors; Log P – Average Prediction of octanol/water partition coefficient; BA – Binding affinity

**Fig. S4** Swiss Target class prediction for compound IOTG

**Fig. S5** The interaction between the GST protein and IOTG, where (A) and (B) are the 3D and 2D diagrams of ligand-protein interaction which show the protein surface, ligand structure, and the interacting residues and atoms.

*Metabolic pathway hypothesization*

In this study, we hypothesized that various noteworthy intracellular adaptive responses were employed against Hg(II) stress which may includes *mer*-mediated detoxification systems, sulfur assimilation metabolism, glutathione metabolism, cysteine and methionine metabolism, and oxidative stress defence and damage repair metabolism (Fig. S6). KEGG enrichment analyses revealed that glutathione, nitrogen, sulfur, cysteine and methionine metabolisms processes are involved in the biosynthesis of thiol compounds. Sulfur metabolism was enriched significantly in presence of inorganic mercury and plays a vital role in heavy metal resistance in living organisms (Zagorchev et al. 2013; Chang et al. 2020; Chang et al. 2021). In the sulfur metabolism, the gene/s such as Sulfate adenylyltransferase (*Sat*), Adenylyl-sulfate kinase (*cysC*), Phosphoadenosine 5'-phosphosulfate reductase (*cysH*), Sulfite reductase (*cysJI*), Cysteine synthase (*cysK*), sulfate permease (*SulP*) and sulfate transporters system (*CysPUWA*), encoded for the sulfate transportation into the cytoplasm were expressed in the presence of Hg2+ (Chang et al. 2020). The production of sulfite for cysteine synthesis is the result of the up-regulation of gene/s responsible for triggering the sulfate assimilation pathway. The cysteine amino acid plays a crucial role in the synthesis of thiol compounds (protein and LMW thiols) by serving sulfur donors, which may contribute to the detoxification of heavy metals in microorganisms (Zagorchev et al. 2013; Huang et al. 2019; Chang et al. 2021). Additionally, gene/s that code for the biosynthesis of L-homocysteine and L-methionine was also induced in presence of Hg2+ and contributed to resistance towards Hg2+. A similar phenomenon in bacteria was also studied by Norambuena et al. 2018.

The gene/s such as GSR and gpx encoded for GSH metabolism were also expressed. In GSH metabolism, the genes encode for gamma-glutamyl transferase (*GGT*), play a key role in maintaining the homeostasis of GSH via disintegrating the extracellular GSH and providing cysteine for GSH synthesis intracellularly (Forman et al. 2009; Chang et al. 2021). Mercury toxicity has been related to reactive oxygen species (ROS) production, which causes the damage of cells and the reduction of cellular redox buffers (Chang et al. 2020). Chang et al. 2020 and 2021 reported that in the presence of Hg2+, genes such as Superoxide dismutase [Cu-Zn] (*sodC*), Superoxide dismutase 1 chaperone (*CCS1*), catalase 1 (*cat1*), catalase-peroxidase (*katA*) are up-regulated and involved in ROS oxidative defence and damage repair. The *sod* enzymes defend mitochondria from oxidative stresses (Reddi et al. 2009, Chang et al. 2021).

**Fig. S6** Hypothesized pathway based on *merA* gene amplification and the GC-MS metabolic profile for the resistance and detoxification response mechanisms of *Halomonas* sp. (NIOT-EQR_J248 and NIOT-EQR_J251) to Hg2+ exposure. (A and B) represents that mercury is uptaken by an active process (*mer* transport), whereas (C) represents that mercury is uptaken by a passive process. GST and IOTG are indicated to play a crucial role in Hg detoxification by combined Mer and GST mechanisms. AP represents the alternative pathway (two-way reaction) between L-Homocysteine and L- Methionine.

**References**

Chang J, Shi Y, Si G, Yang Q, Dong J, Chen J (2020) The bioremediation potentials and mercury(II)-resistant mechanisms of a novel fungus *Penicillium* spp. DC-F11 isolated from contaminated soil. J Hazard Mater. 5;396:122638. doi: 10.1016/j.jhazmat.2020.122638. Epub 2020 Apr 7. PMID: 32361297.

Chang J, Si G, Dong J, Yang Q, Shi Y, Chen Y, Zhou K, Chen J (2021) Transcriptomic analyses reveal the pathways associated with the volatilization and resistance of mercury(II) in the fungus *Lecythophora* sp. DC-F1. Sci Total Environ. 15;752:142172. doi: 10.1016/j.scitotenv.2020.142172. Epub 2020 Sep 2. PMID: 33207499.

Clinical and Laboratory Standards Institute (CLSI 2013). Performance standards for antimicrobial susceptibility testing, 23th informational supplement M100-S23. CLSI, Wayne.

Felsenstein J (1985) Confidence limits on phylogenies: an approach using the bootstrap. Evol. 39, 783–791.

Forman HJ, Zhang H, Rinna A (2009) Glutathione: overview of its protective roles, measurement, and biosynthesis. Mol. Asp. Med. 30, 1–12.

Hassen A, Saidi N, Cherif M, Boudabous A (1998) Resistance of environmental bacteria to heavy metals. Bioresour. Technol. 64:7–15.

https://www.3ds.com/products-services/BIOVIA/products/molecular- modelling simulation / BIOVIA-discovery-studio/visualization. (n.d.).

Huang N, Mao J, Zhao Y, Hu M, Wang X (2019) Multiple transcriptional mechanisms collectively mediate copper resistance in *Cupriavidus gilardii* CR3. Environ. Sci. Technol. 53, 4609–4618.

Kumar S, Stecher G, Li M, Knyaz C, Tamura K (2018) MEGA X: Molecular Evolutionary Genetics Analysis across computing platforms. Mol. Biol. Evol. 35, 1547-1549.

Lee S, Glickmann E, Cooksey A (2001) Chromosomal locus for cadmium resistance in *Pseudomonas putida* consisting of cadmium transporting ATPase and a MerR family response regulator. Appl. Environ.Microbiol. 67:1437-1444.

National Library of Medicine, compound summary - Isooctyl thioglycolate. http://pubchem.n cbi.nlm.nih.gov/compound/isooctyl-thioglycolate

Norambuena J, Wang Y, Hanson T, Boyd JM, Barkay T (2018) Low-molecular-weight thiols and thioredoxins are important players in Hg(II) resistance in *Thermus Thermophilus* HB27. Appl. Environ. Microbiol. 84 e01931-17.

Online SMILES Translator and Structure File Generator tool available at <https://cactus.nci.nih.gov/translate/>

Protein Data Bank database (PDB) <https://www.rcsb.org>

Reddi AR, Jensen LT, Naranuntarat A, Rosenfeld L, Leung E, Shah R, Culotta VC (2009) The overlapping roles of manganese and Cu/Zn SOD in oxidative stress protection. Free Radic. Biol. Med. 46, 154–162.

SubhaAnand S, GEOTRACES INDIA cruse report on ORV SagarKanya Cruise No. 312 sampling for Hydrothermal and GEOTRACES stations under GEOTRACES& Hydrothermal Programme from Mauritius, April 27, 2014 to Goa, May 30, 2014.https://www.bodc.ac.uk/resources/inventories/cruise_inventory/reports/sagarkanya_sk312.pdf

Trott O, Olson AJ (2010). AutoDock Vina: improving the speed and accuracy of docking with a new scoring function, efficient optimization, and multithreading. J Comput Chem. 31(2):455-461. doi:10.1002/jcc.21334

Wang Y, Leung PC, Qian PY, Gu JD (2006) Antibiotic resistant and plasmid profile of environment isolates of *Vibrio* species from Mai Po Nature Reserve, Hong Kong. Ecotoxicol. 15:371-378.

Zagorchev L, Seal CE, Kranner I, Odjakova M (2013) A central role for thiols in plant tolerance to abiotic stress. Int. J. Mol. Sci. 14, 7405–7432.
